# Supplementary material for: Beneficial effect on the soil microenvironment of Trichoderma applied after fumigation for cucumber production
Source: PubMed Central journal article supplement (PMC9345367; doi:10.1371/journal.pone.0266347), 2022-08-02

# PLOS ONE

## Type of contribution: Research Paper

--Manuscript Draft--

|                                             |                                                                                                                                                                                                                                                                                                                                                                                                                                                                                                                                                                                                                                                                                                                                                                                                                                                                                                                                                                                                                                                                                                                                                                                                                                                                                                                                                                                                                                                                                                                                                                                                                                                                                                                                                                                                                                                                                                           |
|---------------------------------------------|-----------------------------------------------------------------------------------------------------------------------------------------------------------------------------------------------------------------------------------------------------------------------------------------------------------------------------------------------------------------------------------------------------------------------------------------------------------------------------------------------------------------------------------------------------------------------------------------------------------------------------------------------------------------------------------------------------------------------------------------------------------------------------------------------------------------------------------------------------------------------------------------------------------------------------------------------------------------------------------------------------------------------------------------------------------------------------------------------------------------------------------------------------------------------------------------------------------------------------------------------------------------------------------------------------------------------------------------------------------------------------------------------------------------------------------------------------------------------------------------------------------------------------------------------------------------------------------------------------------------------------------------------------------------------------------------------------------------------------------------------------------------------------------------------------------------------------------------------------------------------------------------------------------|
| <b>Manuscript Number:</b>                   | PONE-D-22-00468                                                                                                                                                                                                                                                                                                                                                                                                                                                                                                                                                                                                                                                                                                                                                                                                                                                                                                                                                                                                                                                                                                                                                                                                                                                                                                                                                                                                                                                                                                                                                                                                                                                                                                                                                                                                                                                                                           |
| <b>Article Type:</b>                        | Research Article                                                                                                                                                                                                                                                                                                                                                                                                                                                                                                                                                                                                                                                                                                                                                                                                                                                                                                                                                                                                                                                                                                                                                                                                                                                                                                                                                                                                                                                                                                                                                                                                                                                                                                                                                                                                                                                                                          |
| <b>Full Title:</b>                          | Type of contribution: Research Paper                                                                                                                                                                                                                                                                                                                                                                                                                                                                                                                                                                                                                                                                                                                                                                                                                                                                                                                                                                                                                                                                                                                                                                                                                                                                                                                                                                                                                                                                                                                                                                                                                                                                                                                                                                                                                                                                      |
| <b>Short Title:</b>                         | Beneficial effect on the soil microenvironment of Trichoderma applied after fumigation for cucumber production                                                                                                                                                                                                                                                                                                                                                                                                                                                                                                                                                                                                                                                                                                                                                                                                                                                                                                                                                                                                                                                                                                                                                                                                                                                                                                                                                                                                                                                                                                                                                                                                                                                                                                                                                                                            |
| <b>Corresponding Author:</b>                | Yuan Li<br>Institute of Plant Protection<br>Beijing, CHINA                                                                                                                                                                                                                                                                                                                                                                                                                                                                                                                                                                                                                                                                                                                                                                                                                                                                                                                                                                                                                                                                                                                                                                                                                                                                                                                                                                                                                                                                                                                                                                                                                                                                                                                                                                                                                                                |
| <b>Keywords:</b>                            | Soil ecological health, soil-borne pathogens, beneficial microorganisms, Illumina sequencing, cucumber yield.                                                                                                                                                                                                                                                                                                                                                                                                                                                                                                                                                                                                                                                                                                                                                                                                                                                                                                                                                                                                                                                                                                                                                                                                                                                                                                                                                                                                                                                                                                                                                                                                                                                                                                                                                                                             |
| <b>Abstract:</b>                            | <p>Biocontrol agents applied after fumigation play an important role to the soil microenvironment. We studied the effect of Trichoderma applied after dimethyl disulfide (DMDS) plus chloropicrin (PIC) fumigation on the cucumber growth, soil physicochemical properties, enzyme activity, taxonomic diversity, and yield through laboratory and field experiments. The results confirmed that Trichoderma applied after fumigation significantly improved soil physicochemical properties, cucumber growth, soil-borne pathogens, and soil enzyme activity. Genetic analysis indicated that Trichoderma applied after fumigation significantly increased the relative abundance of Pseudomonas, Humicola and Chaetomium, and significantly decreased the relative abundance of the pathogens Fusarium spp. and Gibberella spp., which may help to control pathogens and enhanced the ecological functions of the soil. Moreover, Trichoderma applied after fumigation obviously improved cucumber yield (up to 35.6%), and increased relative efficacy of soil-borne pathogens (up to 99%) and root-knot nematodes (up to 96%). Especially, we found that Trichoderma applied after fumigation increased the relative abundance of some beneficial microorganisms (such as Sodiomyces and Rhizophlyctis) that can optimize soil microbiome. It is worth noting that with the decline in the impact of the fumigant, these beneficial microorganisms still maintain a higher abundance when the cucumber plants were uprooted. Importantly, we found one tested biocontrol agent Trichoderma 267 identified and stored in our laboratory not only improved cucumber growth, reduced soil-borne diseases in late cucumber growth stages but also optimized micro-ecological environment which may have good application prospect and help to keep environmental healthy and sustainable development.</p> |
| <b>Order of Authors:</b>                    | <p>Jiajia Wu</p> <p>Jiahong Zhu</p> <p>Daqi Zhang</p> <p>Hongyan Cheng</p> <p>Baoqiang Hao</p> <p>Aocheng Cao</p> <p>Dongdong Yan</p> <p>Qiuxia Wang</p> <p>Yuan Li</p>                                                                                                                                                                                                                                                                                                                                                                                                                                                                                                                                                                                                                                                                                                                                                                                                                                                                                                                                                                                                                                                                                                                                                                                                                                                                                                                                                                                                                                                                                                                                                                                                                                                                                                                                   |
| <b>Additional Information:</b>              |                                                                                                                                                                                                                                                                                                                                                                                                                                                                                                                                                                                                                                                                                                                                                                                                                                                                                                                                                                                                                                                                                                                                                                                                                                                                                                                                                                                                                                                                                                                                                                                                                                                                                                                                                                                                                                                                                                           |
| <b>Question</b>                             | <b>Response</b>                                                                                                                                                                                                                                                                                                                                                                                                                                                                                                                                                                                                                                                                                                                                                                                                                                                                                                                                                                                                                                                                                                                                                                                                                                                                                                                                                                                                                                                                                                                                                                                                                                                                                                                                                                                                                                                                                           |
| <b>Financial Disclosure</b>                 | Financial Disclosure Statement:                                                                                                                                                                                                                                                                                                                                                                                                                                                                                                                                                                                                                                                                                                                                                                                                                                                                                                                                                                                                                                                                                                                                                                                                                                                                                                                                                                                                                                                                                                                                                                                                                                                                                                                                                                                                                                                                           |
| Enter a financial disclosure statement that | This research was supported by Beijing Innovation Consortium of Agriculture Research System (BAIC01-2019), the National Key Research and Development Program of                                                                                                                                                                                                                                                                                                                                                                                                                                                                                                                                                                                                                                                                                                                                                                                                                                                                                                                                                                                                                                                                                                                                                                                                                                                                                                                                                                                                                                                                                                                                                                                                                                                                                                                                           |

describes the sources of funding for the work included in this submission. Review the [submission guidelines](#) for detailed requirements. View published research articles from [PLOS ONE](#) for specific examples.

This statement is required for submission and **will appear in the published article** if the submission is accepted. Please make sure it is accurate.

#### Unfunded studies

Enter: *The author(s) received no specific funding for this work.*

#### Funded studies

Enter a statement with the following details:

- Initials of the authors who received each award
- Grant numbers awarded to each author
- The full name of each funder
- URL of each funder website
- Did the sponsors or funders play any role in the study design, data collection and analysis, decision to publish, or preparation of the manuscript?
- **NO** - Include this sentence at the end of your statement: *The funders had no role in study design, data collection and analysis, decision to publish, or preparation of the manuscript.*
- **YES** - Specify the role(s) played.

\* typeset

#### Competing Interests

Use the instructions below to enter a competing interest statement for this submission. On behalf of all authors, disclose any [competing interests](#) that could be perceived to bias this work—acknowledging all financial support and any other relevant financial or non-financial competing interests.

This statement is **required** for submission and **will appear in the published article** if the submission is accepted. Please make sure it is accurate and that any funding

China (2018YFD0201300) and the National Natural Science Foundation of China (Program no. 31672066).

Mr. Cao received these funding awards.

The funders had no role in study design, data collection and analysis, decision to publish, or preparation of the manuscript.

The authors have declared that no competing interests exist.

sources listed in your Funding Information later in the submission form are also declared in your Financial Disclosure statement.

View published research articles from [PLOS ONE](#) for specific examples.

**NO authors have competing interests**

Enter: *The authors have declared that no competing interests exist.*

**Authors with competing interests**

Enter competing interest details beginning with this statement:

*I have read the journal's policy and the authors of this manuscript have the following competing interests: [insert competing interests here]*

\* typeset

**Ethics Statement**

N/A

Enter an ethics statement for this submission. This statement is required if the study involved:

- Human participants
- Human specimens or tissue
- Vertebrate animals or cephalopods
- Vertebrate embryos or tissues
- Field research

Write "N/A" if the submission does not require an ethics statement.

General guidance is provided below. Consult the [submission guidelines](#) for detailed instructions. **Make sure that all information entered here is included in the Methods section of the manuscript.**

**Format for specific study types**

**Human Subject Research (involving human participants and/or tissue)**

- Give the name of the institutional review board or ethics committee that approved the study
- Include the approval number and/or a statement indicating approval of this research
- Indicate the form of consent obtained (written/oral) or the reason that consent was not obtained (e.g. the data were analyzed anonymously)

**Animal Research (involving vertebrate animals, embryos or tissues)**

- Provide the name of the Institutional Animal Care and Use Committee (IACUC) or other relevant ethics board that reviewed the study protocol, and indicate whether they approved this research or granted a formal waiver of ethical approval
- Include an approval number if one was obtained
- If the study involved *non-human primates*, add *additional details* about animal welfare and steps taken to ameliorate suffering
- If anesthesia, euthanasia, or any kind of animal sacrifice is part of the study, include briefly which substances and/or methods were applied

**Field Research**

Include the following details if this study involves the collection of plant, animal, or other materials from a natural setting:

- Field permit number
- Name of the institution or relevant body that granted permission

**Data Availability**

Authors are required to make all data underlying the findings described fully available, without restriction, and from the time of publication. PLOS allows rare exceptions to address legal and ethical concerns. See the [PLOS Data Policy](#) and [FAQ](#) for detailed information.

Yes - all data are fully available without restriction

A Data Availability Statement describing where the data can be found is required at submission. Your answers to this question constitute the Data Availability Statement and **will be published in the article**, if accepted.

**Important:** Stating 'data available on request from the author' is not sufficient. If your data are only available upon request, select 'No' for the first question and explain your exceptional situation in the text box.

Do the authors confirm that all data underlying the findings described in their manuscript are fully available without restriction?

**Describe where the data may be found in full sentences. If you are copying our sample text, replace any instances of XXX with the appropriate details.**

- If the data are **held or will be held in a public repository**, include URLs, accession numbers or DOIs. If this information will only be available after acceptance, indicate this by ticking the box below. For example: *All XXX files are available from the XXX database (accession number(s) XXX, XXX).*
- If the data are all contained **within the manuscript and/or Supporting Information files**, enter the following: *All relevant data are within the manuscript and its Supporting Information files.*
- If neither of these applies but you are able to provide **details of access elsewhere**, with or without limitations, please do so. For example:

*Data cannot be shared publicly because of [XXX]. Data are available from the XXX Institutional Data Access / Ethics Committee (contact via XXX) for researchers who meet the criteria for access to confidential data.*

*The data underlying the results presented in the study are available from (include the name of the third party*

All relevant data are within the manuscript and its Supporting Information files.

*and contact information or URL).*

- This text is appropriate if the data are owned by a third party and authors do not have permission to share the data.

\* typeset

Additional data availability information:

1 Beneficial effect on the soil microenvironment of *Trichoderma*  
2 applied after fumigation for cucumber production

3

4 Jiajia Wu<sup>a</sup>, Jiahong Zhu<sup>a</sup>, Daqi Zhang<sup>a</sup>, Hongyan Cheng<sup>a</sup>, Baoqiang Hao<sup>a</sup>,  
5 Aocheng Cao<sup>a,b</sup>, Dongdong Yan<sup>a,b</sup>, Qiuxia Wang<sup>a,b</sup>, Yuan Li<sup>a,b\*</sup>.

6 <sup>a</sup>Institute of Plant Protection, Chinese Academy of Agricultural Sciences,  
7 Beijing 100193, China

8 <sup>b</sup>Beijing Innovation Consortium of Agriculture Research System, Beijing,  
9 100193, China

10 **\*Correspondence author:**

11 Yuan Li

12 E-mail: [liyuancaas@126.com](mailto:liyuancaas@126.com)

13 Tel: +8610-62815940

14 Fax: +8610-62894863

15

16

17

18

1

2

3

4

5 **ABSTRACT:** Biocontrol agents applied after fumigation play an  
6 important role to the soil microenvironment. We studied the effect of  
7 *Trichoderma* applied after dimethyl disulfide (DMDS) plus chloropicrin  
8 (PIC) fumigation on the cucumber growth, soil physicochemical properties,  
9 enzyme activity, taxonomic diversity, and yield through laboratory and  
10 field experiments. The results confirmed that *Trichoderma* applied after  
11 fumigation significantly improved soil physicochemical properties,  
12 cucumber growth, soil-borne pathogens, and soil enzyme activity. Genetic  
13 analysis indicated that *Trichoderma* applied after fumigation significantly  
14 increased the relative abundance of *Pseudomonas*, *Humicola* and  
15 *Chaetomium*, and significantly decreased the relative abundance of the  
16 pathogens *Fusarium* spp. and *Gibberella* spp., which may help to control  
17 pathogens and enhanced the ecological functions of the soil. Moreover,  
18 *Trichoderma* applied after fumigation obviously improved cucumber yield  
19 (up to 35.6%), and increased relative efficacy of soil-borne pathogens (up  
20 to 99%) and root-knot nematodes (up to 96%). Especially, we found that  
21 *Trichoderma* applied after fumigation increased the relative abundance of



1 some beneficial microorganisms (such as *Sodiomyces* and *Rhizophlyctis*)  
2 that can optimize soil microbiome. It is worth noting that with the decline  
3 in the impact of the fumigant, these beneficial microorganisms still  
4 maintain a higher abundance when the cucumber plants were uprooted.  
5 Importantly, we found one tested biocontrol agent *Trichoderma* 267  
6 identified and stored in our laboratory not only improved cucumber growth,  
7 reduced soil-borne diseases in late cucumber growth stages but also  
8 optimized micro-ecological environment which may have good application  
9 prospect and help to keep environmental healthy and sustainable  
10 development.

11

12 **KEYWORDS:** Soil ecological health, soil-borne pathogens, beneficial  
13 microorganisms, Illumina sequencing, cucumber yield.

## 14 **1. Introduction**

15 Cucumber (*Cucumis sativus* Linn) is one of the most extensively cultivated  
16 and consumed vegetable crops in China [1,2]. The production of high-  
17 quality cucumber increases market sales and farmer income, and  
18 encourages further expansion of cucumber production [3]. Unfortunately,  
19 the continuous cropping on the same land depletes soil nutrients, leads to  
20 an accumulation of soil-borne pathogens and a reduction in soil microbes  
21 beneficial to crop production [4,5]. The most effective and convenient

1 method to control soil-borne pathogens and nematodes is soil fumigation  
2 [6]. Chloropicrin (PIC) and dimethyl disulfide (DMDS) effectively control  
3 nematodes, soil-borne pathogens such as *Fusarium* spp. and *Phytophthora*  
4 spp., and they contribute to increase crop yield [7,8]. Although fumigants  
5 are effective and economically feasible for controlling soil-borne  
6 pathogens, their broad-spectrum impact is detrimental to all soil microbes,  
7 including those that are beneficial [9].

8 Soil microorganisms play an important role in the biogeochemical and  
9 nutrient cycles, organic matter formation and decomposition, and soil  
10 structure, which are known to have complex interactions amongst  
11 themselves and with crops grown in the same soil [10,11]. The growth and  
12 quality of cucumbers may also be influenced by the relative abundance of  
13 rhizosphere microorganisms [12]. In addition, the disease presence has  
14 been closely related to changes in the soil microecology that favour plant  
15 pathogens [9]. However, after PIC fumigation, the microbial populations  
16 recover more slowly and the microbial community structure changes [13].  
17 In addition, PIC fumigation over many years reduced the diversity of the  
18 microbial community in the soil [14] and disturbed rhizosphere  
19 microorganisms [13]

20 *Trichoderma* is an effective biocontrol agent for plants grown in  
21 greenhouse as well as fields, showing antifungal properties as well as  
22 promoting growth and inducing plant resistance against pathogenic

1 microorganisms [15,16,17,18]. It is well documented that *Trichoderma*  
2 effectively controlled soil-borne pathogens such as *Fusarium* spp. and  
3 *Phytophthora* spp. [19]. Adding *Trichoderma* to fumigated soil can  
4 prolong the fumigant's control of soil-borne pathogens when populations  
5 increase over time, compared with fumigation alone which becomes  
6 ineffective against pathogens as concentrations decline over time [20,21].  
7 Previous research showed that inoculating *Trichoderma* sometimes failed  
8 to improve crop yield, possibly because the species inoculated without  
9 other microbial species could not adapt to the soil conditions and survive  
10 in an established microbial environment [22]. The addition of a biocontrol  
11 agent after soil fumigation may overcome some of the typical constraints  
12 of biocontrol agent or fumigation applications alone. Tian et al. and Jia et  
13 al. showed that soil fumigation followed by the application of biocontrol  
14 agents increased soil health and crop yield [23,24]. The abundance of  
15 beneficial bacteria and the soil's microbial and physicochemical balance  
16 was also improved [25].

17 However, we found none that reported such taxonomic changes when two  
18 fumigants are used to fumigate the soil prior to the application of  
19 *Trichoderma*.

20 In this study, we first conducted indoor experiment to compare the effects  
21 of commercial *Trichoderma harzianum* and other three *Trichoderma*  
22 strains identified and stored in our laboratory, and then screened stable and

1 efficient *Trichoderma* strains in field trials. The effects of each treatment  
2 on cucumber growth, soil-borne pathogens, soil physicochemical  
3 properties, and the changes in soil enzyme activities and microbial  
4 communities were evaluated. Moreover, we conducted dynamic  
5 monitoring of soil microbes, in order to clarify the dynamic impact on  
6 cucumber growth, soil microorganisms and ecological health and safety by  
7 applying *Trichoderma* to the soil after DMDS plus PIC fumigation.

8

9

## 10 **2 Materials and methods**

### 11 **2.1 Soil preparation for cultivating cucumber seedlings in the** 12 **laboratory**

13 Soil was fumigated with both DMDS and PIC (DP) in a **greenhouse** in  
14 Shunyi District, Beijing (40° 13' N, 116° 65' E). DMDS (99.0% purity;  
15 Beijing Bailingwei Technology Co., Ltd., China) at a dosage of 60 g/m<sup>2</sup>  
16 and PIC (99.5% purity; Dalian Lvfeng Chemical Co Ltd, China) at a  
17 dosage of 20 g/m<sup>2</sup> were artificially injected 15-20 cm into the soil and then  
18 immediately covered with 0.01 mm high-density polyethylene film (HDPE;  
19 Shandong Longxing Science and Technology Co. Ltd., China) for four  
20 weeks. Ten days after removing the film, fumigated and untreated soil were  
21 collected from within 5-20 cm of the soil surface. The soil samples were

1 sieved through a 2 mm sieve to remove debris. The soil moisture content  
2 was adjusted to 60% of the maximum field water capacity with disinfected  
3 and deionized water. The soil samples were incubated at 28 °C for 10 d in  
4 the dark. Each 300g cultivated soil was transferred to a flowerpot for  
5 cucumber potting experiment. The physicochemical properties of the soil  
6 used in these experiments are shown in Table S1.

## 7 **2.2 Indoor potting experiment**

### 8 **2.2.1 Preparation of *Trichoderma* spore suspension and procedures for** 9 **growing cucumber seedlings**

10 Commercial *Trichoderma harzianum* ('HZ'; Hainan Jinyufeng Biological  
11 Engineering Co., Ltd., China) and three other strains had been isolated,  
12 verified and stored by our laboratory: *T. harzianum pseudoharzianum* 30  
13 ('T30'), *T. longibrachiatum* 265 ('T265') and *T. afroharzianum* 267  
14 ('T267'). All species and strains of *Trichoderma* were individually  
15 cultured on PDA for 5 d, then the spore suspensions were washed with  
16 sterilized and distilled water before being filtered with 4-layer gauze. The  
17 concentration of the spore suspension was adjusted to  $1.0 \pm 0.05 \times 10^7$   
18 spores/mL with a hemocytometer.

19 Cucumber seeds (Jingyou 4, Beijing Wanlongyufeng Seed Co., Ltd., China)  
20 were soaked in water at 60°C for 5 h, then placed on sterile wet filter paper  
21 in 150 mm diameter petri dishes at 28 °C for 24 h to germinate. Germinated

1 seeds were sown into a seedling tray. The cucumber seedlings were  
2 transplanted from the tray to individual pots when the seedlings were in the  
3 ‘three-leaf and heart’ stage.

#### 4 **2.2.2 Experimental design for seedlings cultivated in pots**

5 After cucumber seedlings were transplanted to the pots, the *Trichoderma*  
6 spore suspension strains were applied individually onto the cucumber  
7 seedling root. We added 30 mL *Trichoderma* spore suspension  
8 ( $1.0 \pm 0.05 \times 10^7$  spores/mL) and 30 mL of commercial *Trichoderma*  
9 *harzianum* diluted 100 times to the soil after fumigation and without any  
10 fumigation. There were 10 treatments: DP30 (DP followed by application  
11 with *Trichoderma* strain 30), DP265, DP267, DP (fumigation only), CK30  
12 (*Trichoderma* strain 30 without any fumigation), CK265, CK267, DPHZ  
13 (fumigation followed by commercial *T. harzianum*); CKHZ (*T. harzianum*  
14 without any fumigation); and CK (without fumigation or *Trichoderma*  
15 spp.). Each treatment contained 10 pots of cucumber seedlings. There were  
16 three applications of *Trichoderma* at intervals of 7 d. The indoor  
17 temperature and humidity were maintained at 26 °C and 45%, respectively.  
18 The cucumber seedlings were removed from the pots after six weeks. The  
19 roots were washed with water and their length were measured using  
20 calipers. The plants were air-dried in an oven with a fan at 65 °C for 72 h  
21 until they no longer lost weight. The fresh root length, stem length, stem

1 diameter, plant fresh weight, plant dry weight and leaf chlorophyll content  
2 were recorded for plants in each treatment.

### 3 **2.2.3 Fungal soil-borne pathogens and root-knot nematode analysis**

4 Selective medium methods were used to isolate colonies of *Fusarium* spp.  
5 and *Phytophthora* spp. in the soil and to calculate their abundance,  
6 following the methods described by Komada and Masago et al.,  
7 respectively [26,27]. The size of the root-knot nematode (*Meloidogyne* spp.)  
8 population was quantified using the method described by Liu [28].

### 9 **2.2.4 Soil physicochemical properties and enzyme activity**

10 A Futura™ Continuous Flow Analytical System (Alliance Instruments,  
11 France) was used to quantify ammonia nitrogen (NH<sub>4</sub><sup>+</sup>-N) and nitrate  
12 nitrogen (NO<sub>3</sub><sup>-</sup>-N) concentrations in each soil sample. The available  
13 phosphorus (P) was determined according to the method described by  
14 Olsen et al.[29]. Available potassium (K) was determined using a FP640  
15 Flame Photometer (Shanghai Instruments Group Co., Ltd., China). The  
16 organic matter (OM) content was quantified according to the K<sub>2</sub>Cr<sub>2</sub>O<sub>7</sub>-  
17 H<sub>2</sub>SO<sub>4</sub> oxidation reduction method described by Schinner et al [30]. A  
18 MP512-02 Precision Water Meter was used to measure the pH of the soil  
19 sample (Shanghai Sanxin Instrumentation, Inc., China). A MP513  
20 Conductivity Meter was used to determine the electrical conductivity (EC)  
21 (Shanghai Sanxin Instrumentation, Inc., China) of the soil.

1 Soil sucrase and urease activities were measured as indicators of the soil's  
2 enzyme activity. Sucrase activity was measured using a Soil Saccharase  
3 (S-SC) Assay Kit (Beijing Solarbio Science & Technology Co., Ltd.,  
4 China). Soil urease activity was determined by Soil Urease (S-UE) Assay  
5 Kit (Beijing Solarbio Science & Technology Co., Ltd., China). The  
6 activities of sucrase and urease were measured according to their  
7 absorbance at 630 and 540 nm, respectively, using a FlexStation® 3  
8 Multimode Microplate Reader (Molecular Devices LLC., USA).

#### 9 **2.2.5 Extraction of soil DNA, PCR amplification, high-throughput** 10 **sequencing**

11 Total soil DNA was extracted from each 0.25 g soil sample using DNeasy  
12 Power Soil Kit (Qiagen Com., China). The extracted soil DNA was plated  
13 out onto 1% agarose gel for electrophoresis, and then the DNA  
14 concentration measured using a NanoDrop® ND-1000 UV-Vis  
15 Spectrophotometer (Thermo Fisher Scientific Inc., USA). The bacterial  
16 universal primers 338F [5'-ACTCCTACGGAGCAGGCAG-3'] and 806R  
17 [5'-GGACTACHGGGGTWTCTAAT-3'] and fungal universal primers  
18 ITS1F [5'-CTTGGTCATAGAGGAGTAA-3'] and ITS2R [5'-  
19 GCTGCTATCGATGC-3'] were used to amplify the V3-V4 region of  
20 bacteria and the ITS1 region of fungi, respectively. PCR products were  
21 detected by gel electrophoresis (plated out on 2% agarose) and purified  
22 using the EasyPure® Quick Gel Extraction Kit (TransGen Biotech Co.,



1 Ltd., China) and quantified using the QuantiFluor<sup>®</sup> dsDNA System (Fisher  
2 Scientific, USA). The purified PCR products were sequenced by Majorbio  
3 Bio-Pharm Technology Co. Ltd. (Shanghai, China) and microbial analyses  
4 were conducted using the MiSeq PE300 sequencing platform (Illumina  
5 Com., USA). The raw sequences were processed using the Mothur  
6 software. Sequences with less than 50 bp, ambiguous bases, and those with  
7 an average mass less than 20 were removed by FLASH and Trimmomatic  
8 software to obtain the effective sequences. Usearch (version 7.1  
9 <http://drive5.com/uparse/>) software is used to cluster sequences with 97%  
10 similarity into Operational Taxonomic Units (OTUs). Qiime software  
11 (Version 1.9.1) and Unit (v7.2) database (<https://unite.ut.ee/>) were used for  
12 species annotation analysis and sample community composition analysis.  
13 Qiime software (Version 1.9.1) was used to calculate the richness of the  
14 flora (Chao1 index, Shannon index) and the diversity of the flora (Simpson  
15 index, Ace index). R software (Version 2.15.3) was used to draw the  
16 dilution curve and bar diagrams of species at genus level.

### 17 **2.2.6 Real-time quantitative PCR**

18 Quantitative PCR was conducted on a CFX96 Touch<sup>™</sup> Real-Time PCR  
19 Detection System (Bio-Rad, USA) in a total volume of 20  $\mu$ L. The  
20 fluorescent dye SYBR Green was used to identify the target genes. The  
21 reaction using 10  $\mu$ L of 2  $\times$  SsoFast<sup>™</sup> EvaGreen<sup>®</sup> Supermix (Bio-Rad  
22 Laboratories, USA), 1  $\mu$ L of soil genomic DNA template and 0.5  $\mu$ M of

1 *Trichoderma* forward and reverse primer. Information on the *Trichoderma*  
2 gene-specific qPCR primers and thermal programs is shown in Table S2.  
3 Melting curve analysis was used to confirm the product specificity. The  
4 amplification efficacies were > 90% and R<sup>2</sup> values were > 0.99 for the  
5 target genes.

### 6 **2.3 Field experiments**

7 Field trials were carried out in the Shunyi District, Beijing (40° 13' N, 116°  
8 65' E). The physicochemical properties of the field soil are shown in Table  
9 S1. The area of each plot was 1.2 m wide×3 m long. We added 50 mL  
10 *Trichoderma* spore suspension ( $1.0\pm 0.05\times 10^7$  spores/mL) and 50 mL of  
11 commercial *Trichoderma harzianum* diluted 100 times to the soil after  
12 fumigation and without any fumigation. There were 6 treatments: DP30  
13 (DP followed by application with *Trichoderma* strain 30), DP265, DP267,  
14 DP (fumigation only) and CK (without fumigation or *Trichoderma* spp.).  
15 Six treatments were established on randomly designed plots, with three  
16 replicates for each treatment. There were three applications of *Trichoderma*  
17 at intervals of 7 d. Soil was sampled from each treatment 2-20 cm deep on  
18 day 1 before application of *Trichoderma*, on day 7 after the third  
19 application of *Trichoderma* and when the cucumber plants were uprooted.  
20 Soil samples were refrigerated at -80°C and 4°C for later analysis of changes  
21 in the microbial community, soil-borne pathogens, and root-knot nematode.  
22 The total marketable yield of cucumber from each treatment were recorded

1 in kg at successive harvests.

## 2 **2.4 Statistical analysis**

3 The efficacy of each treatment against soil-borne pathogens and root-knot  
4 nematode was determined by:

$$5 \quad Y = \frac{X_0 - X_1}{X_0} \times 100\%$$

6 where Y is the relative efficacy on soil-borne pathogens and root-knot  
7 nematode,  $X_0$  is the number of soil-borne pathogens and root-knot  
8 nematode in the control, and  $X_1$  is the number of soil-borne pathogens and  
9 root-knot nematode in the treatment group.

10 Data were analyzed as a one-way ANOVA using the IBM SPSS Statistics  
11 25 software package (IBM, USA). Significant differences between  
12 treatments were identified using Duncan's new multiple range test at the  
13 0.05 level of significance. All treatments were compared with the control  
14 (CK), except where specifically stated.

## 15 **3 Results**

### 16 **3.1 Laboratory studies**

#### 17 **3.1.1 Changes in the plant growth**

18 Compared to the control, DP30, DP265 and DP267 and DPHZ  
19 significantly increased stem diameter by 44.8%, 30.6%, 54.3% and 34.1%,  
20 respectively (Table 1). In addition, DPHZ and DP30 increased chlorophyll  
21 content significantly by 25.6% and 27.6%, respectively. CK265 increased

1 plant stem length and diameter significantly by 50.2% and 33.8%,  
2 respectively. CK30 increased stem diameter significantly by 43.0%.  
3 Compared with the single treatments, some combinations showed  
4 synergistic plant growth promotion. When *Trichoderma* were added after  
5 fumigation, especially in the DP267 treatment that increased diameter and  
6 dry weight significantly by 54.3% and 108.4%, respectively. The diameter  
7 and dry weight in DP267 increased compared to the control and DP.

### 8 **3.1.2 Changes in the fungal soil-borne pathogens**

9 Compared to the control, the number of *Fusarium* spp. and *Phytophthora*  
10 spp. were significantly reduced after DP followed by *Trichoderma* spp.,  
11 achieving 96.5% to 98.9% control of both pathogens (Table S3). Notably,  
12 DP followed by *Trichoderma* decreased *Phytophthora* spp. colonies  
13 compared to the DP, but the differences were not significant. Particularly,  
14 DP267 significantly reduced the number of *Fusarium* spp. and  
15 *Phytophthora* spp. colonies, achieving 97.7% to 98.9%.

### 16 **3.1.3 Changes in the soil's physicochemical properties**

17 The concentrations of  $\text{NH}_4^+\text{-N}$  and  $\text{NO}_3^-\text{-N}$  increased significantly after DP  
18 fumigation compared to the control (Fig. S1a-b). Available P significantly  
19 increased only in the DP, DP30, DP265, DP267 and DPHZ treatments  
20 compared with the control, but CK30, CK265, CK267 and CKHZ were  
21 similar to the control. (Fig. S1c). Compared with DP, the addition of  
22 *Trichoderma* after fumigation increased the content of effective

1 phosphorus and available potassium. Compared to the control available K  
2 was significantly increased by DP30, DP265, DP267 and DPHZ treatments  
3 (Fig. S1d).

4 Compared with the control, the organic matter content increased  
5 significantly after the combined applications of DP and *Trichoderma*. (Fig.  
6 S1e). Moreover, single applications of the *Trichoderma* did not increase  
7 the organic matter content. The soil pH decreased significantly after DP  
8 fumigation (except the DP267 treatment) compared to the control (Fig.  
9 S1f). Conversely, the EC of the soil was significantly increased after  
10 applying *Trichoderma* in fumigated soil. (Fig. S1g).

#### 11 **3.1.4 Changes in the soil enzyme activity**

12 Compared with the control, urease activity and sucrase activity were  
13 reduced significantly by DP30, DP265, DP267, DPHZ and DP treatments  
14 (Fig. 1a), but there were no significant differences in urease activity  
15 between control and the single applications of the *Trichoderma* treatments.  
16 Notably, sucrase activity was increased significantly after the combined  
17 applications of fumigants and *Trichoderma* compared with DP (Fig. 1b).  
18 Particularly, DP267 significantly increased the urease activity and sucrase  
19 activity, by 45% and 114%, respectively (Table S4).

#### 20 **3.1.5 Changes in the abundance of *Trichoderma* in soil**

21 Compared to the control, the gene copy number of *Trichoderma* increased  
22 significantly when the *Trichoderma* 267 was applied, but the other three

1 treatments were not significantly different to the control. In addition,  
2 CK267 resulted in significantly more *Trichoderma* than DP267 (Fig. S2).

### 3 **3.1.6 Changes in the soil's bacterial taxonomy**

4 After quality trimming, a total of 1,029,649 effective sequences were  
5 obtained. The average length of the effective sequences was 418 bp. The  
6 rarefaction curves for bacteria reached a plateau, which indicated that the  
7 genetic data were sufficient for a reasonable. In general, the ACE and  
8 Chao1 indices indicate the community species richness, and the Shannon  
9 and Simpson indices indicate community species diversity. Biological  
10 diversity is positively correlated with Shannon, ACE and Chao1 diversity  
11 indices and negatively correlated with Simpson diversity index.

12 Compared to the control, the Shannon, ACE and Chao1 indices for the  
13 bacterial community in the DP, DP267 and DPHZ decreased significantly,  
14 but the Simpson diversity index increased significantly (Table S5). Those  
15 results suggested that *Trichoderma* added to soil with DP fumigation  
16 reduced bacterial taxonomic diversity. Compared with the DP, the Shannon  
17 index of DP267 decreased significantly. There were no significant  
18 differences in the ACE and Chao1 diversity indices between the DP267  
19 and DP.

20 The principal co-ordinates analysis has two main coordinate **components**  
21 **PC1 and PC2 (Fig. S3)**. Species like each other are in proximity in the  
22 Principal Coordinate Analysis (PCoA) diagram. These samples from the

1 fumigation and non-fumigation treatments could be delineated as two  
2 lineages. The non-fumigation treatments were in the direction of PC1 and  
3 separate from the fumigation treatments. PC1 and PC2 contributed 55.45%  
4 and 22.84% to the differences in species composition among treatments,  
5 respectively.

6 The relative abundance in the community of bacterial genera changed after  
7 fumigation. The dominant genus in the bacterial community was *Bacillus*.  
8 Compared with CK, DP267, DPHZ and DP all increased the relative  
9 abundance of *Bacillus*. The relative abundance of *Sphingomonas* decreased  
10 in each treatment compared with the control. Compared with the CK,  
11 DP267 significantly increased the relative abundance of  
12 *Gemmatimonadaceae*. DP267, DPHZ and DP all increased the relative  
13 abundance of *Pseudomonas* and *Alphaproteobacteria* compared with the  
14 control (Fig. 1c).

15 The environmental factors were screened by the variance inflation factor  
16 (VIF). The VIF values after screening were all less than 5. Therefore, the  
17 ordination plots obtained through redundancy analysis (RDA) were used  
18 to reveal the relationship between treatments and environmental factors  
19 (Fig. S4a). The results showed that pH and the relative abundance of  
20 *Trichoderma* (T) in the soil were significantly correlated with the negative  
21 of the second axis (RDA2). K, EC, and A-N were positively correlated with  
22 RDA1 and RDA2, but they were negatively correlated with pH and T.

1 A correlation heatmap was used to assess the relationship between bacterial  
2 abundance at the genera levels and the soil's physicochemical properties  
3 (K, electrical conductivity, nitrogen, pH) and the abundance of  
4 *Trichoderma* in soil. The results showed that bacterial abundance was  
5 affected by the soil's physicochemical properties and the abundance of  
6 *Trichoderma* in soil. There were differences in the effects of different types  
7 of bacteria on the soil's physicochemical properties and the abundance of  
8 *Trichoderma* in soil. The correlation heat map of environmental factors and  
9 30 dominant genera of microbes showed that available K, EC, and A-N  
10 were significantly positively correlated with *Gemmatimonadaceae* and  
11 *Bacillus*; and significantly negatively correlated with *Alphaproteobacteria*  
12 (Fig. 2a). In addition, A-N was significantly negatively correlated with  
13 *Pseudomonas*. pH was significantly negatively correlated with *Bacillus*,  
14 and significantly positively correlated with *Pseudomonas* and  
15 *Alphaproteobacteria*. The abundance of *Trichoderma* was significantly  
16 negatively correlated with *Bacillus*, and significantly positively correlated  
17 with *Alphaproteobacteria*.

### 18 **3.1.7 Changes in the soil's fungal taxonomy**

19 After quality trimming, a total of 1,496,147 effective reads were obtained  
20 from the genetic sequencing of fungi. The average length of the effective  
21 reads was 250 bp. The number of valid sequences detected for each soil  
22 sample exceeded 60,000 and the rarefaction curve reached a plateau, which



1 indicated that the genetic data sufficiently represented the taxonomic  
2 composition and diversity of the fungi in the sampled soil.

3 Compared with the control, the Shannon index of DP267 decreased  
4 significantly, but the Simpson diversity index increased significantly  
5 (Table S6). The ACE index of these treatments decreased significantly for  
6 all treatments except CKHZ. The Chao1 index decreased significantly for  
7 all treatments except CKHZ and DPHZ. Most of the treatments therefore  
8 decreased the diversity and richness of the soil fungal community.

9 The contribution of PC1 and PC2 to species composition differences  
10 between different treatment samples was 51.54% and 22.3%, respectively.  
11 The PCoA analysis delineated the treatments into three regions (Fig.S3b).  
12 In relation to the abscissa, the CK267, CKHZ and DP were furthest from  
13 the control, suggesting that there was a significant difference. In relation to  
14 the ordinate, CK267 was furthest from the control, suggesting that there  
15 was a significant difference between the two samples.

16 Compared with the DP, DP267 and DPHZ significantly increased the  
17 relative abundance of the genera *Humicola* and *Chaetomium*, and  
18 significantly reduced the relative abundance of *Aspergillus*, *Fusarium* and  
19 *Gibberella* (Fig. 1d).

20 RDA results showed that pH and the presence of *Trichoderma* were  
21 significantly and positively correlated with K, EC, and A-N, but they were  
22 negatively correlated with pH and *Trichoderma* (Fig.S4b).

1 A-N, Available K and EC was significantly negatively correlated with  
2 *Humicola* and *Chaetomium*; and significantly positively correlated with  
3 *Aspergillus*, *Gibberella*, and *Fusarium*. Soil pH was significantly  
4 positively correlated with *Humicola* and *Olpidium*; Soil pH and T  
5 significantly negatively correlated with *Aspergillus*, *Gibberella* and  
6 *Fusarium* (Fig. 2b).

### 7 **3.2 Field studies**

8 Laboratory experiment results showed that applying *Trichoderma* after  
9 fumigation can improve soil conditions, increase the relative abundance of  
10 beneficial microorganisms, and optimize the soil microenvironment. In  
11 order to verify the effectiveness of *Trichoderma* in the field, we monitored  
12 changes in soil-borne pathogens, root-knot nematodes, cucumber yield and  
13 soil's microbial community.

#### 14 **3.2.1 Changes in the fungal soil-borne pathogens and root-knot** 15 **nematodes**

16 When the cucumber plants were uprooted, *Trichoderma* applied after  
17 fumigation Trials 1 and 2 significantly reduced fungal soil-borne pathogens  
18 and *Meloido-gyne* spp. compared with the CK (Table S7). DP267  
19 significantly reduced the number of colonies of *Fusarium* spp. by about  
20 94.2% and 81.7% in Trials 1 and 2, respectively, whereas DP achieved only  
21 about 65.6% to 86.2% efficacy. *Trichoderma* applied after fumigation  
22 therefore improved the efficacy of *Fusarium* spp. control by 20% to 30%,

1 compared to the DP. DP267 significantly reduced *Phytophthora* spp. by  
2 83.5% and 95.8% in Trials 1 and 2, respectively, whereas DP achieved only  
3 about 56.1% to 80.5% efficacy. DP267 significantly reduced *Meloido-gyne*  
4 spp. by more than 96% (Trial1 and Trial 2). Compared to the DP, DP267  
5 therefore improved the efficacy of *Meloido-gyne* spp. control by 6% to 8%  
6 (Trial 1). Compared with the CK, DPHZ had a higher percentage of control  
7 of *Fusarium* spp. than the DP267, but the percentage of control of  
8 *Phytophthora* spp. and *Meloido-gyne* spp. were lower. DP was the least  
9 effective treatment against *Fusarium* spp., *Phytophthora* spp., and  
10 *Meloido-gyne* spp.

### 11 **3.2.2 Changes in the cucumber yield**

12 Compared with the control, DP significantly increased cucumber yield by  
13 25.1% (Trial 1), whereas DP267 and DPHZ treatments significantly  
14 increased yield by 32.7% and 35.8%, respectively. Compared with the  
15 control, DP267 and DPHZ treatments were like each other and  
16 significantly increased yield by 20% (Trial 2). Cucumber total marketable  
17 yield was 10.0% higher after application of *Trichoderma* after fumigation,  
18 compared with the DP (Fig. 6 and Table S8).

### 19 **3.2.3 Changes in the soil's bacterial and fungal taxonomy**

20 In the bacterial community, before applying *Trichoderma*, the Shannon  
21 diversity index and Chao richness index for the bacteria community

1 fumigated with DMDS and PIC decreased significantly compared with the  
2 control (Fig. 3a). After applying *Trichoderma*, the Shannon diversity index  
3 of DP267, DPHZ, DP decreased significantly compared with the control.  
4 Notably, compared with the DP, the diversity index of Shannon increased  
5 significantly in the DPHZ treatment and the richness index of Chao  
6 increased significantly in the DP267, DPHZ treatments (Fig. 3b). When the  
7 cucumber plants were uprooted, there were no significant differences in the  
8 diversity index of Shannon. Notably, compared with the DP, the richness  
9 index of Chao increased significantly in the DP267, DPHZ treatments (Fig.  
10 3c).

11 There were significant differences in the relative abundance of bacterial  
12 genus before applying *Trichoderma*, after applying *Trichoderma* and when  
13 the cucumber plants were uprooted (Fig. 5a-c). During the whole growth  
14 period of cucumber, *Bacillus* is the most abundant bacterial genus. Before  
15 applying *Trichoderma*, the relative abundance of *Sphingomonas* decreased  
16 significantly compared with the control. The relative abundance of  
17 *Sphingomonas* of DP267 and DPHZ increased significantly after applying  
18 *Trichoderma* and became the second abundant bacterial genus until the  
19 cucumber plants were uprooted. Before applying *Trichoderma*, the relative  
20 abundance of *Pseudomonas* was significantly reduced, which is one of the  
21 dominant genera, and then after *Trichoderma* was added, the abundance of

1 *Pseudomonas* decreased. The relative abundance of *Pseudomonas*  
2 eventually recovered to levels that were not significantly different.

3 In the fungal community, before applying *Trichoderma*, the Shannon  
4 diversity index for the fungal community fumigated with DMDS and PIC  
5 decreased significantly compared with the control, there were no  
6 significant differences in the richness index of Chao for the fungal  
7 community before applying *Trichoderma* (Fig. 4a). After applying  
8 *Trichoderma*, the Shannon diversity index of DP267, DPHZ, DP decreased  
9 significantly compared with the control. Notably, compared with the DP,  
10 the diversity index of Shannon increased significantly in the DP267  
11 treatment. The Chao richness index of DP decreased significantly (Fig. 4b).

12 When the cucumber plants were uprooted, the Shannon diversity index of  
13 DP267, DPHZ, DP increased significantly compared with the DP.  
14 Compared with the control, there were no significant differences in the  
15 richness index of Chao for the fungal community (Fig. 4c). In the fungal  
16 community, DP fumigation reduced the diversity of soil microorganisms,  
17 but after adding *Trichoderma*, *Trichoderma* treatments increased the  
18 diversity of microorganisms. These results indicated that *Trichoderma* can  
19 mitigate against the effects of DP fumigation by increasing the diversity of  
20 microorganisms.

21 In the fungal community, there were more genera with the significant  
22 differences that significantly changed their relative abundance after

1 treatment with *Trichoderma* than in the bacterial community (Fig. 5d-f).  
2 The relative abundance of some genera varied at different times. Before  
3 applying *Trichoderma*, *Sodiomyces* was the most abundant fungal genus  
4 and there was no significant difference in the relative abundance of  
5 *Sodiomyces*. After applying *Trichoderma*, *Albifimbria* became the most  
6 abundant fungal genus and the relative abundance of *Sodiomyces*  
7 decreased significantly. Compared with the control, each treatment  
8 significantly decreased the relative abundance of *Albifimbria*. When the  
9 cucumber plants were uprooted, the relative abundance of *Sodiomyces*  
10 increased significantly in the DPHZ treatment and became one of the most  
11 abundant fungal genera. Before applying *Trichoderma*, there was no  
12 significant difference in the relative abundance of the *Rhizophlyctis* and  
13 *Chaetomium* compared with the control. After applying *Trichoderma* and  
14 when the cucumber plants were uprooted, DP267 treatment increased the  
15 relative abundance of *Rhizophlyctis*. When the cucumber plants were  
16 uprooted, *Rhizophlyctis* became one of the dominant genera, and the  
17 relative abundance of *Chaetomium* in the DP267 and DPHZ treatments  
18 significantly increased compared to DP. Compared with the control, DP267  
19 increased the relative abundance of *Rhizophlyctis* when the cucumber  
20 plants were uprooted. After applying *Trichoderma*, each treatment  
21 significantly reduced the relative abundance of *Albifimbria*. After applying  
22 *Trichoderma* and when the cucumber plants were uprooted, fumigation

1 treatments significantly reduced the relative abundance of *Fusarium*  
2 compared with the control. Importantly, the relative abundance of  
3 *Trichoderma* strains 267 has little change in colonization status during the  
4 growth period.

## 5 **4 Discussion**

6 This study investigated the effects of *Trichoderma* applied after fumigation  
7 on the cucumber growth and soil's microecology, including changes in  
8 soil's physicochemical properties and enzyme activities, and changes in the  
9 abundance of beneficial soil microorganisms. The results suggest that  
10 *Trichoderma* applied after fumigation could improve cucumber growth and  
11 optimize soil's microecology. Importantly, more widespread use of  
12 *Trichoderma* could lead to more sustainable crop production methods by  
13 reducing the use of chemical pesticides.

### 14 **4.1 Laboratory studies**

#### 15 **4.1.1 Effects on the cucumber growth**

16 In this work, we found that *Trichoderma* applied after fumigation  
17 promoted cucumber growth in the laboratory. Especially, DP267 showed  
18 excellent synergistic plant growth promotion. *Trichoderma* has been  
19 reported to improve crop fitness and promote crop growth, especially when  
20 growth conditions are unfavorable [31]. The application of *Trichoderma*  
21 promoted cucumber growth, enhanced the ability of cucumber to resist

1 pathogens and may improve the disease resistance of cucumber, which has  
2 very important practical significance for increasing cucumber yield.

### 3 **4.1.2 Effects on the soil's physicochemical properties, soil enzyme** 4 **activity and soil-borne pathogens**

5 Soil's physicochemical properties, enzyme activity and soil-borne  
6 pathogens in the soil are used as indicators of soil health [32]. The  
7 nitrification of ammonia and denitrification of nitrate in soil is reported to  
8 change the relative abundance of  $\text{NH}_4^+\text{-N}$  and  $\text{NO}_3^-\text{-N}$  continuously [33].

9 We observed that *Trichoderma* applied after fumigation reduced  
10 nitrification and increased nitrate nitrogen in the soil, which was consistent  
11 with the results of Fang et al. *Trichoderma* applied after fumigation  
12 increased the concentration of effective phosphorus, available potassium,  
13 and organic matter, indicating that *Trichoderma* increased soil fertility and  
14 enhanced soil functions, which had also been reported previously.  
15 Moreover, *Trichoderma* applied changed the physicochemical properties  
16 of the soil, such as increasing its ionic strength, reducing the clay,  
17 increasing the dissolved organic matter, and changing the pH [34]. We  
18 observed that some *Trichoderma* applied after fumigation treatments  
19 reduced pH but increased EC, which may be related its ability to participate  
20 in the production of metabolites such as amino acids and proteins. Soil pH



1 had direct or indirect impacts on the abundance of microbial populations  
2 that improved the soil's antibacterial properties.

3 We observed that fumigation had a transient effect on soil enzyme  
4 concentration, which was consistent with the results of Zhang et al. [35].

5 Importantly, we observed that *Trichoderma* applied after fumigation,  
6 especially DP267 treatment, significantly increased the activity of soil  
7 enzymes, compared with the DP. *Trichoderma* added after fumigation  
8 appeared to alleviate the adverse effects of fumigation and accelerate soil  
9 recovery. Previous research reported that *Trichoderma* improved the soil  
10 environment, increased enzymes activity and root respiration [36,37]. Soil  
11 enzymes increased in activity which improves the prospects of restoring  
12 the soil's ecological health. This will help maintain the healthy  
13 development of soil micro-ecological stability for a long time.

14 We observed that each treatment reduced the populations of *Fusarium* spp.  
15 and *Phytophthora* spp., indicating that *Trichoderma* or fumigation can  
16 effectively control soil pathogens. It is well documented that *Trichoderma*  
17 or fumigation effectively controlled soil-borne pathogens such as  
18 *Fusarium* spp. and *Phytophthora* spp. [19, 38].

#### 19 **4.1.3 Effect on soil microbial community**

20 We found that fumigation significantly reduced the alpha diversity indices  
21 of soil bacterial community. We observed that the difference between

1 single *Trichoderma* applied treatments and CK in the alpha diversity  
2 indices was the least significant, which indicated that single *Trichoderma*  
3 treatments had a little impact on the diversity of the bacterial communities.  
4 In the fungi community, we observed that the alpha diversity indices of  
5 abundance were largest between CK and DP267, indicating that DP267  
6 significantly affected the diversity of fungal communities. Previous  
7 research also reported that fumigation reduced the abundance and diversity  
8 of soil bacterial and fungal communities [35]. The PCoA analysis showed  
9 that soil fumigation significantly changed the taxonomic composition of  
10 the soil's bacterial and fungal communities.

11 In the bacterial community, the dominant genus in the soil was *Bacillus*  
12 spp. Compared to the CK, DP267 and DPHZ increased the relative  
13 abundance of *Bacillus* and *Gemmatimonadaceae*. *Bacillus* and  
14 *Gemmatimonadaceae* are considered beneficial bacteria as plant growth  
15 improves when they are inoculated into the soil [39]. *Gemmatimonadaceae*  
16 was significantly positively correlated with available potassium, which  
17 was consistent with the study of Liang et al [40]. The relative abundance  
18 of *Bacillus* and *Gemmatimonadaceae* was significantly positively  
19 correlated with soil nutrients. We observed that application of DP267 and  
20 DPHZ increased the abundance of *Pseudomonas* compare to the DP.

1 *Pseudomonas* is reported to be an effective biological control agent and  
2 therefore beneficial for controlling plant pathogens [41].

3 In the fungi community, the relative abundance of *Humicola* and  
4 *Chaetomium* in the DP267 and DPHZ significantly increased, indicating  
5 *Trichoderma* promoted *Humicola* and *Chaetomium* population growth.  
6 *Humicola* is a common, filamentous fungi found in the soil that can  
7 decompose plant residues by secreting thermostable cellulase [42].  
8 *Chaetomium* is a biocontrol agent that reduces pathogenic fungi and  
9 promotes plant growth [43].

10 The results indicated that *Trichoderma* can promote the recovery of  
11 beneficial microorganisms. These beneficial microorganisms increased the  
12 availability of essential nutrients to plants (e.g., nitrogen, phosphorus), and  
13 produce and regulate compounds involved in plant growth [44]. The  
14 presence of beneficial bacteria and fungi, which may in turn improve the  
15 productivity and disease resistance of cucumber. In order to confirm the  
16 effect of adding *Trichoderma* after fumigation on cucumber yield and soil-  
17 borne diseases, we conducted a field experiment to evaluate the effect of  
18 *Trichoderma* in the field.

## 19 **4.2 Field studies**

### 20 **4.2.1 Effect on soil-borne pathogens, root knot nematode and yield**

1 When the cucumber plants were uprooted, our field results showed that  
2 *Trichoderma* applied after fumigation reduced soil-borne pathogens and  
3 increased the total marketable yields of cucumber, which was consistent  
4 with the results of Fang et al. [8]. DP267 significantly decreased the  
5 occurrence of root-knot nematode and increased the cucumber yield. In the  
6 later stage of cucumber growth, the efficiency of fumigation on soil-borne  
7 pathogens and root-knot nematode was reduced, but DP267 treatment still  
8 maintained a high efficiency. The results showed that the successful  
9 **colonization of *Trichoderma*** can continue to protect cucumbers from soil-  
10 borne diseases and reduce the use of pesticides in the later stages of  
11 cucumber growth. Overall, the combined application reduced the  
12 abundance of soil-borne pathogens and the occurrence of root knot  
13 nematode, and improved the growing conditions for cucumbers and  
14 increased their yield. It is well documented that *Trichoderma* combined  
15 with chemical pesticides can reduce chemical pesticide application  
16 frequency, reduce soil-borne pathogens, and improve crop yield [45,23].  
17 Fumigation combined with *Trichoderma* treatments can strengthen the  
18 colonization of *Trichoderma* and reduce the risk of a rapid increase in the  
19 abundance of soil-borne pathogens, which is vital for reconstruction and  
20 functional restoration of soil microbial community after fumigation. It has  
21 been demonstrated that *Trichoderma* 267 exhibit promising effects against  
22 root-knot nematode.

#### 1 4.2.2 Effect on soil microbial community

2 Microorganisms present in the rhizosphere play a crucial role in  
3 determining the growth and health of plants and soil. The microbial  
4 interactions in the rhizosphere are often of benefit to plants, improve soil  
5 fertility, enhance the degradation of toxic chemicals. Importantly, root-  
6 associated microbiota in the rhizosphere plays important roles and  
7 positively influence the health and the growth of their host plant through  
8 various mechanisms [46]. The promotion of plant growth by  
9 microorganisms is based on a better acquisition of nutrients, hormonal  
10 stimulation and several direct or indirect mechanisms linked to plant  
11 growth, and could be involved in the reduction/suppression of plant  
12 pathogens [47,48].

13 We found that *Trichoderma* to the soil after fumigation increased the  
14 diversity and richness of soil bacteria and fungi, which may have  
15 stimulated an increase in the dominant genera in the microbial community.

16 The result was supported by previous research that reported the application  
17 of *Trichoderma* increased soil microbial diversity [49]. In addition, high  
18 soil microbial diversity or abundance can inhibit soil-borne disease  
19 pathogens [25].

20 After adding *Trichoderma* to DP-fumigated soil changed the bacterial and  
21 fungal community composition significantly during the growth of

1 cucumber. After applying *Trichoderma* and when the cucumber plants  
2 were uprooted, *Bacillus* and *Sphingomonas* became dominant bacteria  
3 genus. The results indicated that after the application of *Trichoderma*, the  
4 two genera of beneficial bacteria are always in a dominant position. We  
5 opined that adding *Trichoderma* after fumigation helps the soil microbial  
6 community to rebuild. Moreover, the colonization of *Trichoderma* can  
7 maintain the optimized soil microenvironment and protect cucumber from  
8 pathogens infection in the later stages of growth.

9 We found that *Trichoderma* applied after fumigation significantly changed  
10 the relative abundance of *Sodiomyces*. After applying with *Trichoderma*,  
11 the relative abundance of *Sodiomyces* decreased and then increased in the  
12 DPHZ treatment with the increased time of growth. Previous research has  
13 shown *Sodiomyces* can produce antimycotic compounds [50]. When the  
14 cucumber plants were uprooted, DP267 increased the relative abundance  
15 of *Rhizophlyctis*. *Rhizophlyctis* became one of the dominant genera.  
16 *Rhizophlyctis* is a highly effective plant biomass degrader, which can  
17 produce a diverse array of secreted enzymes [51]. These results indicated  
18 that commercial *Trichoderma* and strains had different effects on soil  
19 microorganisms, but both increased the abundance of beneficial  
20 microorganisms, and strain 267 had a better effect on cucumbers when the  
21 fumigant effect decreased.

1 *Trichoderma* applied after fumigation significantly changed increased the  
2 abundance of *Chaetomium* compared to DP. After applying *Trichoderma*,  
3 each treatment significantly reduced the relative abundance of *Albifimbria*  
4 and *Fusarium*. *Albifimbria* is a pathogenic fungus that can cause leaf spot  
5 on crops [52]. In addition, we found that *Trichoderma* strains 267 has little  
6 change in colonization status during the growth period, which indicated  
7 that the colonization ability of strain 267 is stronger than that of  
8 commercial *Trichoderma*. These results indicated that *Trichoderma* 267  
9 can reduce soil-borne pathogens to increase beneficial microorganisms,  
10 rebuild soil microbial community composition, restore soil enzyme activity,  
11 and optimize cucumber rhizosphere environment.

12 *Trichoderma* 267 can help to decrease soil-borne pathogens, increase the  
13 abundance of beneficial microorganisms, and stabilize the soil  
14 microenvironment that is disrupted by fumigation. Many microorganisms  
15 are killed and populations reduced shortly after fumigation. *Trichoderma*  
16 can accelerate their recovery, especially when fumigant concentrations  
17 decline over time, and create a more stable soil environment in the longer  
18 term than when fumigants are used alone. We showed that *Trichoderma*  
19 also promoted the growth of cucumber, kept pathogens below economic  
20 thresholds, increased enzyme activity and the relative abundance of  
21 beneficial bacteria and fungi in the soil.

## 22 **5 Conclusions**

1 Our results highlight the usefulness of *Trichoderma* strain 267 used in  
2 combination with fumigants. Compared with commercialized *Trichoderma*  
3 *harzianum*, *Trichoderma* 267 has the potential to become a commercial  
4 preparation. In conclusion, laboratory and field experiments have proved  
5 that *Trichoderma* applied after fumigation reduced the occurrence of soil-  
6 borne diseases, optimize the soil microenvironment, promoted cucumber  
7 growth, enhances cucumber disease resistance, and increases cucumber  
8 yield. *Trichoderma* applied after fumigation has a application prospect and  
9 help to prevent soil-borne diseases, keep environmental healthy and  
10 sustainable development.

#### 11 **Author contribution**

12 Jiajia Wu and Yuan Li designed the study and wrote the protocol; Jiajia  
13 Wu, Jiahong Zhu, Hongyan Cheng and Baoqiang Hao collected the soil  
14 samples. Jiajia Wu, Daqi Zhang, Jiahong Zhu carried out determination of  
15 soil physico-chemical properties; Jiajia Wu performed most of the  
16 experiments; Jiajia Wu, Dongdong Yan, Qiuxia Wang managed the  
17 literature search and analyses; Jiajia Wu and Jiahong Zhu analyzed the data;  
18 Jiajia Wu, Aocheng Cao and Yuan Li were responsible for the overall  
19 design and wrote the manuscript.

#### 20 **Contact information for authors**



1 Jiajia Wu (15737160876@163.com), Jiahong Zhu (1246299129@qq.com),  
2 Daqi Zhang (1275745493@qq.com), Hongyan Cheng  
3 (1136913480@qq.com), Baoqiang Hao (18562316368@163.com),  
4 Aocheng Cao (caoac@vip.sina.com), Dongdong Yan  
5 (13260176634@163.com), Qiuxia Wang (wqxcasy@163.com).

## 6 **Declaration of competing interest**

7 The authors declare no conflict of interest.

## 8 **Acknowledgments**

9 This research was supported by Beijing Innovation Consortium of  
10 Agriculture Research System (BAIC01-2019), the National Key Research  
11 and Development Program of China (2018YFD0201300) and the National  
12 Natural Science Foundation of China (Program no. 31672066). We thank  
13 Dr. Tom Batchelor for providing editorial comments and for revising the  
14 manuscript.

15

## 16 **References**

17 1 Zhao LJ, Sun YP, Jose A HV, Alia DS, Hong J, Niu GH, et al. Influence  
18 of CeO<sub>2</sub> and ZnO nanoparticles on cucumber physiological markers  
19 and bioaccumulation of Ce and Zn: a life cycle study. *Journal of*  
20 *Agricultural and Food Chemistry*. 2013; 61(49): 11945–11951.

- 1 2 Zhu J.H., Ren, Z.J., Huang, B., Cao, A.C., Wang, Q.X., Yan, D., et al.  
2 Effects of Fumigation with Allyl Isothiocyanate on Soil Microbial  
3 Diversity and Community Structure of Tomato. *Journal of*  
4 *Agricultural and Food Chemistry*. 2020;68:1226–1236.
- 5 3 Tang M, Xu DW. Research status of protected cultivation of melons and  
6 fruits. *Agricultural Technology Service*. 2019;36(11): 16-18.
- 7 4 Ren ZJ, Li Y, Fang WS, Yan D, Huang B, Zhu JH, et al. Evaluation of  
8 allyl isothiocyanate as a soil fumigant against soil- borne diseases in  
9 commercial tomato (*Lycopersicon esculentum* Mill.) production in  
10 China. *Pest Management Science*. 2018; 74(9): 2146–2155.
- 11 5 Li XG, Ding CF, Zhang TL, Wang X. Fungal pathogen accumulation at  
12 the expense of plant-beneficial fungi as a consequence of consecutive  
13 peanut monoculturing. *Soil Biology and Biochemistry*.2014; 72.
- 14 6 Wang Q, Tan J, Wei S, Wang F, Yan D, Mao L, et al. 1,3-  
15 dichloropropene distribution and emission after gelatin capsule  
16 formulation application. *J Agric. Food Chem*. 2010; 58: 361–365.
- 17 7 Arnault I, Fleurance C, Frédéric V, Gaël DF, Auger J. Use of alliaceae  
18 residues to control soil-borne pathogens. *Industrial Crops and*  
19 *Products*. 2013; 49(49): 265-272.

- 1 8 Fang WS, Cao AC, Han DW, Liu PF, Yan D, Wang QX. The effects of  
2 two fumigants on the prevention and control of soil-borne diseases  
3 and the effect of cucumber yield. *China Vegetables*. 2016; 7: 44-48.
- 4 9 Cheng HY, Zhang DQ, Huang B, Ren LR, Hao BQ, Jin Q, et al. Research  
5 progress on the effect of microbial fertilizer on soil microecology after  
6 fumigant treatment. *Chinese Journal of Pesticide Science*. 2020a;  
7 22(05):734-741.
- 8 10 Chaparro JM, Sheflin AM, Manter DK, Vivanco JM. Manipulating the  
9 soil microbiome to increase soil health and plant fertility. *Biol Fert*  
10 *Soils*. 2012; 48(5): 489-499.
- 11 11 Niu XY, Sun XM, Chen DS, Zhang SG. Soil microorganisms' nutrients  
12 and enzyme activity of *Larix Kaempferia* plantation under different  
13 ages in mountainous region of eastern Liaoning Province, China. *Chin.*  
14 *J. Appl. Ecol*. 2015; 26 (9): 2663-2672.
- 15 12 Compant S, Clément S, Sessitsch A. Plant growth-promoting bacteria  
16 in the rhizo- and endosphere of plants: their role, colonization,  
17 mechanisms involved and prospects for utilization. *Soil Biol Biochem*.  
18 2010; 42(5): 669-678.
- 19 13 Li J, Huang B, Wang Q X, Li Y, Fang WS, Yan DD, et al. Effect of  
20 fumigation with chloropicrin on soil bacterial communities and genes

- 1 encoding key enzymes involved in nitrogen cycling. *Environ Pollut.*  
2 2017; 227: 534–542.
- 3 14 Zhang DL, Ji XX, Meng Z, Qi WZ, Qiao K. Effects of fumigation with  
4 1,3-dichloropropene on soil enzyme activities and microbial  
5 communities in continuous-cropping soil. *Ecotoxicology and*  
6 *Environmental Safety.* 2019a; 169: 730-736.
- 7 15 Zhang FG, Zhu Z, Yang XM, Ran W, Shen QR. *Trichoderma harzianum*  
8 T-E5 significantly affects cucumber root exudates and fungal  
9 community in the cucumber rhizosphere. *Appl Soil Ecol.* 2013; 72:  
10 41-48. doi: 10.1016/j.apsoil.2013.05.016
- 11 16 Fu J, Xiao Y, Wang YF. *Trichoderma* affects the physiochemical  
12 characteristics and bacterial community composition of saline–  
13 alkaline maize rhizosphere soils in the cold-region of Heilongjiang  
14 Province. *Plant and Soil.* 2019; 436: 211-227.
- 15 17 Inglis PW, Mello SCM, Martins I, Silva JBT, Macêdo K, Sifuentes DN.  
16 *Trichoderma* from Brazilian garlic and onion crop soils and  
17 description of two new species: *Trichoderma azevedoi* and  
18 *Trichoderma peberdyi*. *PLoS ONE.* 2020;15(3).
- 19 18 Fábio AS, Vandinelma OV, Rafael CS, Daniel GP, Marcos AS.  
20 Introduction of *Trichoderma* spp. *Trichoderma* biocontrol strains

- 1        against *Sclerotinia sclerotiorum* (Lib.) de Bary change soil microbial  
2        community composition in common bean (*Phaseolus vulgaris* L.)  
3        cultivation. *Biological Control*. 2021;163.
- 4    19 Sridharan AP, Sugitha T, Karthikeyan G, Nakkeeran S, Sivakumar U  
5        Metabolites of *Trichoderma longibrachiatum* EF5 inhibits soil borne  
6        pathogen, *Macrophomina phaseolina* by triggering amino sugar  
7        metabolism. *Microbial Pathogenesis*. 2021; 150.
- 8    20 Cao AC, Liu XM, Guo MX, Wang QX, Li Y, Ouyang CB, et al. Harm  
9        and control technology of crop soil-borne diseases. *Plant Protection*.  
10       2017; 43(02): 6-16.
- 11   21 Cheng HY, Zhang DQ, Huang, B., Song, Z.X., Ren, L.R., Hao, B.Q., et  
12       al. Organic fertilizer improves soil fertility and restores the bacterial  
13       community after 1,3-dichloropropene fumigation. *Science of the*  
14       *Total Environment*.2020b; 738.
- 15   22 Yan S, Wu HS, Zhou XD. Research progress in biological control of  
16       cucumber fusarium wilt. *Shandong Agricultural Sciences*. 2011;  
17       000(001): 86-92.
- 18   23 Tian T.The synergistic effect and mechanism of the soil fumigant  
19       Mianlong and *Gliocladium* in the control of cucumber wilt. *Chinese*  
20       *Academy of Agricultural Sciences*. 2013.

- 1 24 Jia XX, Shi GY, Huang W. The effect of soil disinfectant combined  
2 with microbial organic fertilizer and biocontrol agent to alleviate the  
3 continuous cropping obstacles of eggplant in facility. *Molecular Plant*  
4 *Breeding*. 2020; 13.
- 5 25 Cheng HY, Zhang DQ, Ren LR, Song ZX, Li QJ, Wu JJ. et al. Bio-  
6 activation of soil with beneficial microbes after soil fumigation  
7 reduces soil-borne pathogens and increases tomato yield.  
8 *Environmental Pollution*. 2021; 283.
- 9 26 Komada H. Development of a selective medium for quantitative  
10 isolation of *Fusarium oxysporum* from natural soil. *Rev. Plant Prot.*  
11 *Res*. 1975; 8: 114-125.
- 12 27 Masago H, Yoshikawa M, Fukada M, Nakanishi N. Selective inhibition  
13 of *Pythium* spp. on a medium for direct isolation of *Phytophthora* spp.  
14 from soils and plants. *Phytopathology*. 1977; 77 (3): 425-428.
- 15 28 Liu W. *Plant Pathogenic Nematodes*. China Agriculture Press, Beijing  
16 2000; pp. 373.
- 17 29 Olsen SR, Cole CV, Watanabe FS. Dean, L.A. Estimation of Available  
18 Phosphorus in Soils by Extraction with Sodium Bicarbonate; USDA  
19 Circ. 939, USDA: Washington, D C. 1954.

- 1 30 Schinner F, Öhlinger R, Kandeler DE, Margesin R. Methods in Soil  
2 Biology. Springer Verlag, Berlin, 1995; 386-389.
- 3 31 Khomari S, Davari M. Trichoderma-Induced Enhancement of Soybean  
4 Seedling Performance in Response to Salt Stress. Plant Physiol Breed.  
5 2017; 7: 27-39.
- 6 32 Gao M, Song W, Zhou Q. Interactive effect of oxytetracycline and lead  
7 on soil enzymatic activity and microbial biomass. Environmental  
8 Toxicology & Pharmacology.2013.
- 9 33 Yan DD, Wang QX, Guo MX, Guo ZB, Cao AC. Effects of four  
10 fumigantson soil nitrogen transformation. Chin. J. Eco-Agric. 2010;  
11 18: 934-938.
- 12 34 Basotra N, Kaur B, Di Falco M, Tsang A, Chadha BS. Mycothermus  
13 thermophilus (syn. scytilidium thermophilum): repertoire of a diverse  
14 array of efficient cellulases and hemicellulases in the secretome  
15 revealed. Bioresour. Technol. 2016; 222: 413–421.
- 16 35 Zhang DQ, Yan DD, Fang WS, Huang B, Wang XL, Wang XN, et al.  
17 Chloropicrin alternated with biofumigation increases crop yield and  
18 modifies soil bacterial and fungal communities in strawberry  
19 production. Science of the Total Environment. 2019b; 675: 615-622.

- 1 36 Khan Y, Haque M, Molla H, Rahman M, Alam M.Z. Antioxidant  
2 compounds and minerals in tomatoes by Trichoderma-enriched  
3 biofertilizer and their relationship with the soil environments, Journal  
4 of Integrative Agriculture. 2017; 16(3): 691-703.
- 5 37 Pan FB, Xiang L, Wang S, Li JJ, Shen X, Chen XS, et al. Effects of  
6 short-term rotation and Trichoderma application on the soil  
7 environment and physiological characteristics of *Malus hupehensis*  
8 Rehd. seedlings under replant conditions. *Acta Ecologica Sinica*.  
9 2017; 37(5):315-321.
- 10 38 Li QJ, Zhang DQ, Cheng HY, Song ZX, Ren LR, Hao BQ, et al.  
11 Chloropicrin alternated with dazomet improved the soil ' s  
12 physicochemical properties, changed microbial communities and  
13 increased strawberry yield, *Ecotoxicology and Environmental Safety*.  
14 2021; 220.
- 15 39 Zhao XL, Lu SJ, He SL, Luo LL, Zhou LN, Zhou YF. Bacterial  
16 diversity of tea rhizosphere soil based on high-throughput sequencing  
17 technology and the effect of soil beneficial microorganisms on the  
18 occurrence of tea anthracnose. *Tea News*. 2020;194(04): 49-55.
- 19 40 Liang HH. Effects of different fertilization treatments on wheat yield,  
20 soil physical and chemical properties and soil microorganisms in  
21 saline-alkali land. 2018.



- 1 41 Hollister EB, Hu P, Wang AS, Hons FM, Gentry TJ. Differential  
2 impacts of brassicaceous and nonbrassicaceous oilseed meals on soil  
3 bacterial and fungal communities. *FEMS Microbiol. Ecol.* 2013; 83  
4 (3): 632–641.
- 5 42 Chen Y. Screening and identification of high-yield cellulase mutant  
6 strains of *Humicola insolens* from Linyuan and optimization of  
7 protoplast transformation system. Shanxi Agricultural  
8 University. 2019; 12.
- 9 43 Kumar R, Kundu A, Dutta A, Saha S, Das A, Bhowmik A. Chemo-  
10 profiling of bioactive metabolites from *Chaetomium globosum* for  
11 biocontrol of *Sclerotinia* rot and plant growth promotion. *Fungal*  
12 *Biology.* 2020.
- 13 44 Oleńska E, Małek W, Wójcik M, Swiecicka I, Thijs S, Vangronsveld J.  
14 Beneficial features of plant growth-promoting rhizobacteria for  
15 improving plant growth and health in challenging conditions: A  
16 methodical review. *Science of The Total Environment.* 2020; 743.
- 17 45 Liu XY, Wang YY, Fan HY, Duan YX. *Trichoderma citrinum*  
18 Snef1910 combined with thiazolysts to control root-knot nematodes  
19 with reduced application and increased efficiency. *Journal of*  
20 *Shenyang Agricultural University.* 2020; 51(06): 755-761.

- 1 46 Imane C, Nasreddine EO, Abdelaali B, Naoual EM, Taoufiq B, Cherki  
2 G. Is the rhizosphere a source of applicable multi-beneficial  
3 microorganisms for plant enhancement?.Saudi Journal of Biological  
4 Sciences. 2021.
- 5 47 Velázquez E, Peix A, Zurdo-Piñeiro JL, Palomo JL, Mateos PF, Rivas  
6 R. et al. The coexistence of symbiosis and pathogenicity-determining  
7 genes in *Rhizobium rhizogenes* strains enables them to induce  
8 nodules and tumors or hairy roots in plants. Molecular plant-microbe  
9 interactions : MPMI. 2005; 18(12): 1325-1332.
- 10 48 Berg G. Plant-microbe interactions promoting plant growth and health:  
11 perspectives for controlled use of microorganisms in agriculture Appl.  
12 Microbiol. Biotechnol. 2009; 84: 11-18.
- 13 49 Xiong W, Guo S, Jousset A, Zhao Q, Wu H, Li R. Bio-fertilizer  
14 application induces soil suppressiveness against *Fusarium* wilt  
15 disease by reshaping the soil microbiome. Soil Biol. Biochem. 2017;  
16 114: 238–247.
- 17 50 Kuvarina AE, Georgieva ML, Rogozhin E, et al., Antimicrobial  
18 Potential of the Alkalophilic Fungus *Sodiomyces alkalinus* and  
19 Selection of Strains–Producers of New Antimicotic Compound.  
20 Applied Biochemistry and Microbiology, 2021; 57(1):86-93.

- 1 51 Gleason FH, Bo P, Henderson LE. The key ecological role and biology  
2 of *Rhizophlyctis rosea*, a zoosporic, early lineage fungus in soil  
3 ecosystems. 2019.
- 4 52 Gilardi G, Matic S, Luongo I, Gullino ML, Garibaldi A. First report of  
5 stem necrosis and leaf spot of tomato caused by *albifimbria verrucaria*  
6 in italy. *Plant Disease*. 2020; 104(7).

## Figures

**Fig. 1** Changes in soil urease (S-UE; graph a) and soil sucrase (S-SC; graph b) activity following different soil treatments after fumigants. Relative abundance of bacterial (c) and fungal (d) genera in response to the following treatments.

**Fig. 2** Correlation heat map of environmental factors and 30 dominant genera of microbes.

**Fig. 3** Diversity analysis of bacteria in response to the following treatments.

**Fig. 4** Diversity analysis of fungi in response to the following treatments.

**Fig. 5** Relative abundance of bacterial (a, b, c) and fungal (d, e, f) genera in response to the following treatments.

**Fig. 6** The total marketable yield of cucumber following the fumigation of the soil with both dimethyl disulfide + chloropicrin (DP).

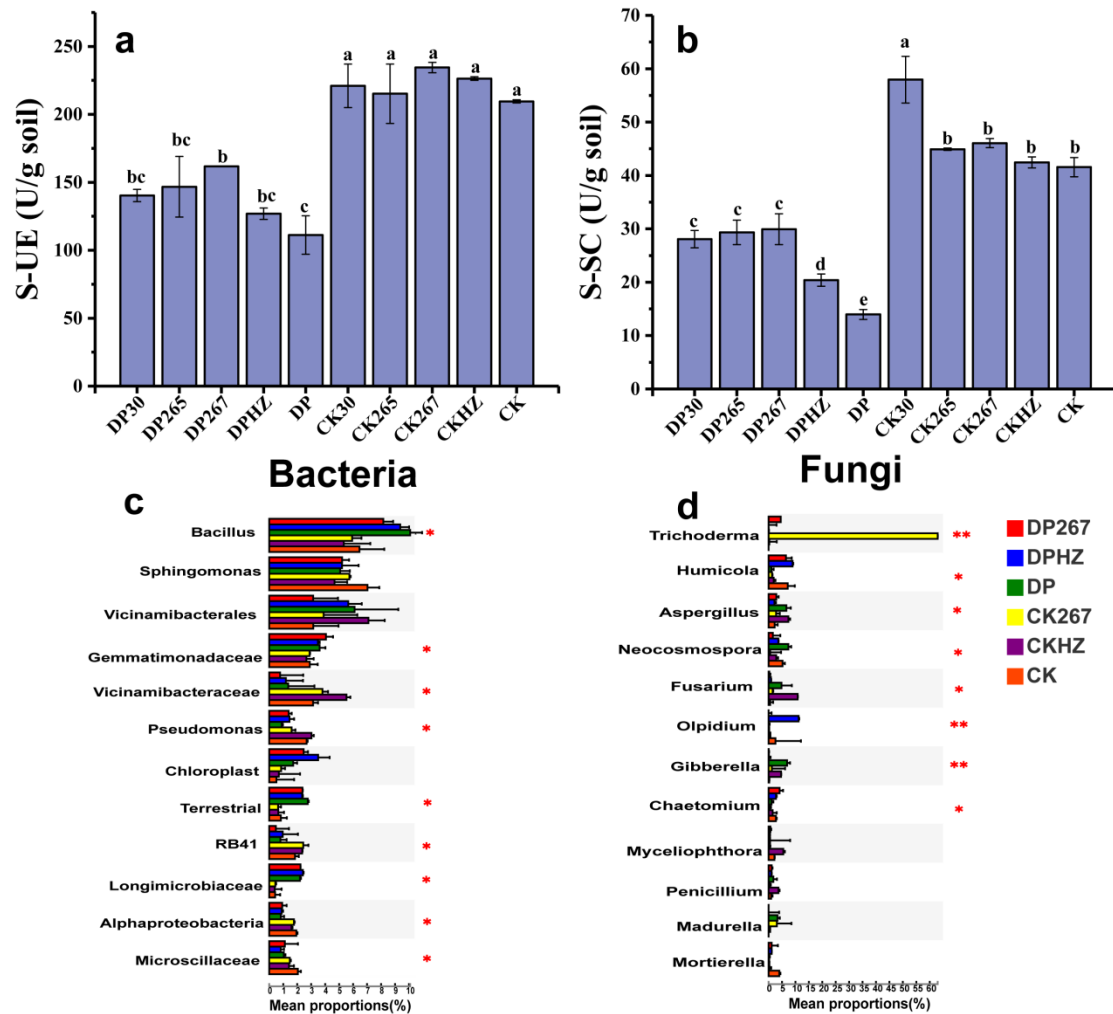

**Fig. 1:** Changes of soil urease (S-UE; graph a) and soil sucrase (S-SC; graph b) activity following different soil treatments after fumigants. Means (N = 3) within the same time period accompanied by the same letter were not statistically different (P = 0.05), according to Duncan's new Multiple-Range test. Relative abundance of bacterial (c) and fungal (d) genera in response to the following treatments. The number of asterisks indicates the degree of correlation (P < 0.05): (\*p < 0.05, \*\*p < 0.01, \*\*\*p < 0.001). DP30, DP265 or DP267 = *Trichoderma* spp. strain 30, 265 or 267 added after dimethyl disulfide (D) + chloropicrin fumigation (P) (see 2.2.2. in the text for detail); DPHZ = Commercial *T. harzianum* added to soil after fumigation. DP = fumigation without *Trichoderma*. CK30, CK265 or CK 267 = *Trichoderma* spp. strains 30, 265 or 267 added individually to soil without fumigation. CKHZ = Commercial *T. harzianum* added to soil without fumigation. CK = untreated control.

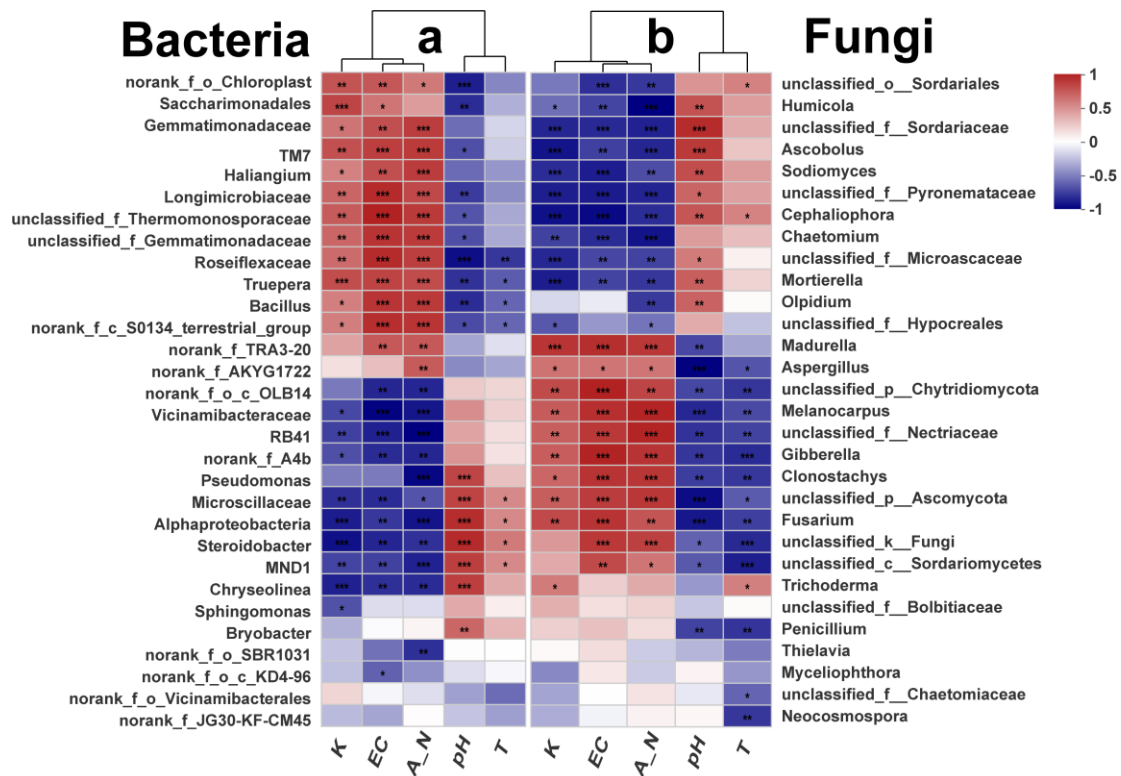

**Fig. 2:** Correlation heat map of environmental factors and 30 dominant genera of microbes. pH = pH of the soil; T = relative abundance of *Trichoderma* in the soil; K = available potassium; A-N = Ammonium nitrogen; EC = electrical conductivity. Different color intensities represent the normalized relative population size of each genus, based on Spearman's rank correlation coefficient. The number of asterisks indicates the degree of correlation ( $P < 0.05$ ): (\* $p < 0.05$ , \*\* $p < 0.01$ , \*\*\* $p < 0.001$ ).

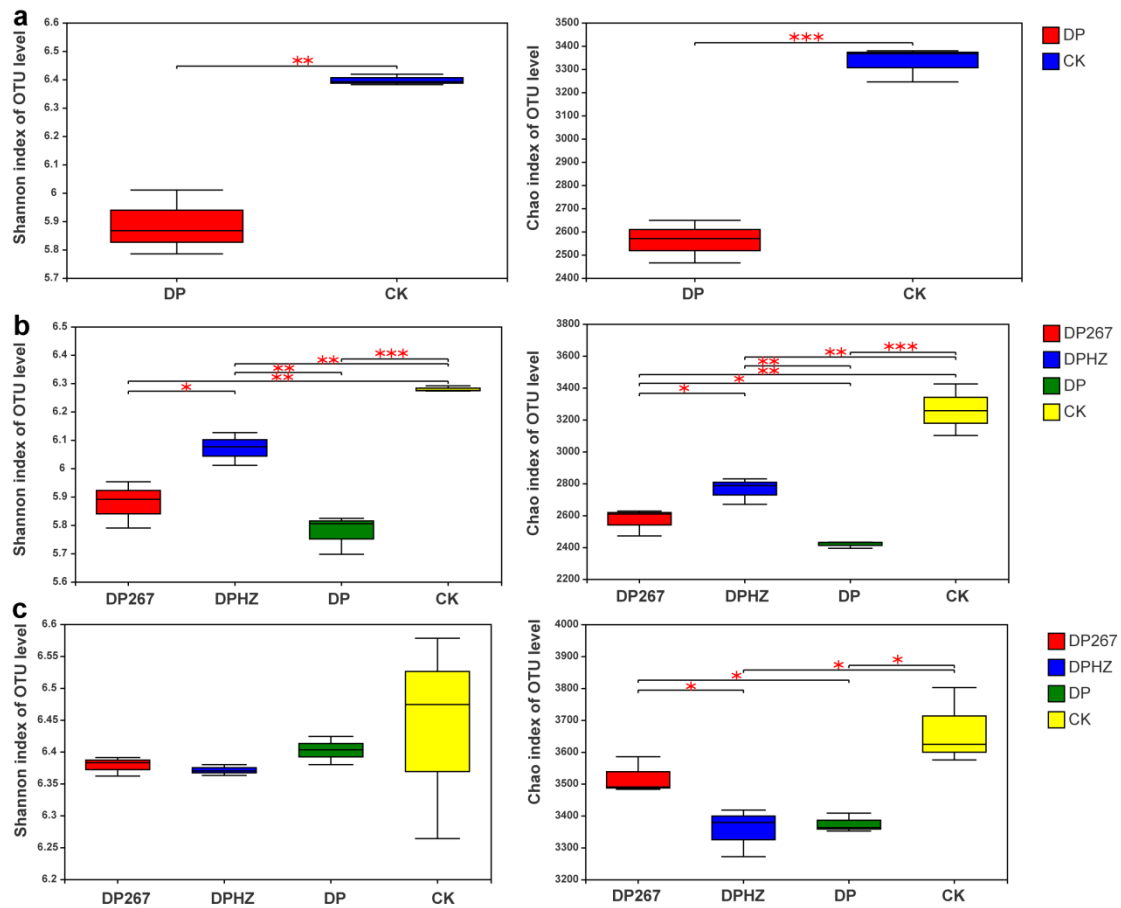

**Fig. 3:** Diversity analysis of bacteria in response to the following treatments: DP267 = *Trichoderma* spp. strain 267 added to soil after fumigation with both dimethyl disulfide (D) and chloropicrin (P). DPHZ = Commercial *T. harzianum* added to soil after fumigation. DP = Fumigation without the addition of *Trichoderma*. CK = Untreated control. Soil was sampled from each treatment 2-20 cm deep on day 1 before applying *Trichoderma* (a), on day 7 after the third applying *Trichoderma* (b) and when the cucumber plants were uprooted(c). The number of asterisks indicates the degree of correlation ( $P < 0.05$ ): (\* $p < 0.05$ , \*\* $p < 0.01$ , \*\*\* $p < 0.001$ ).

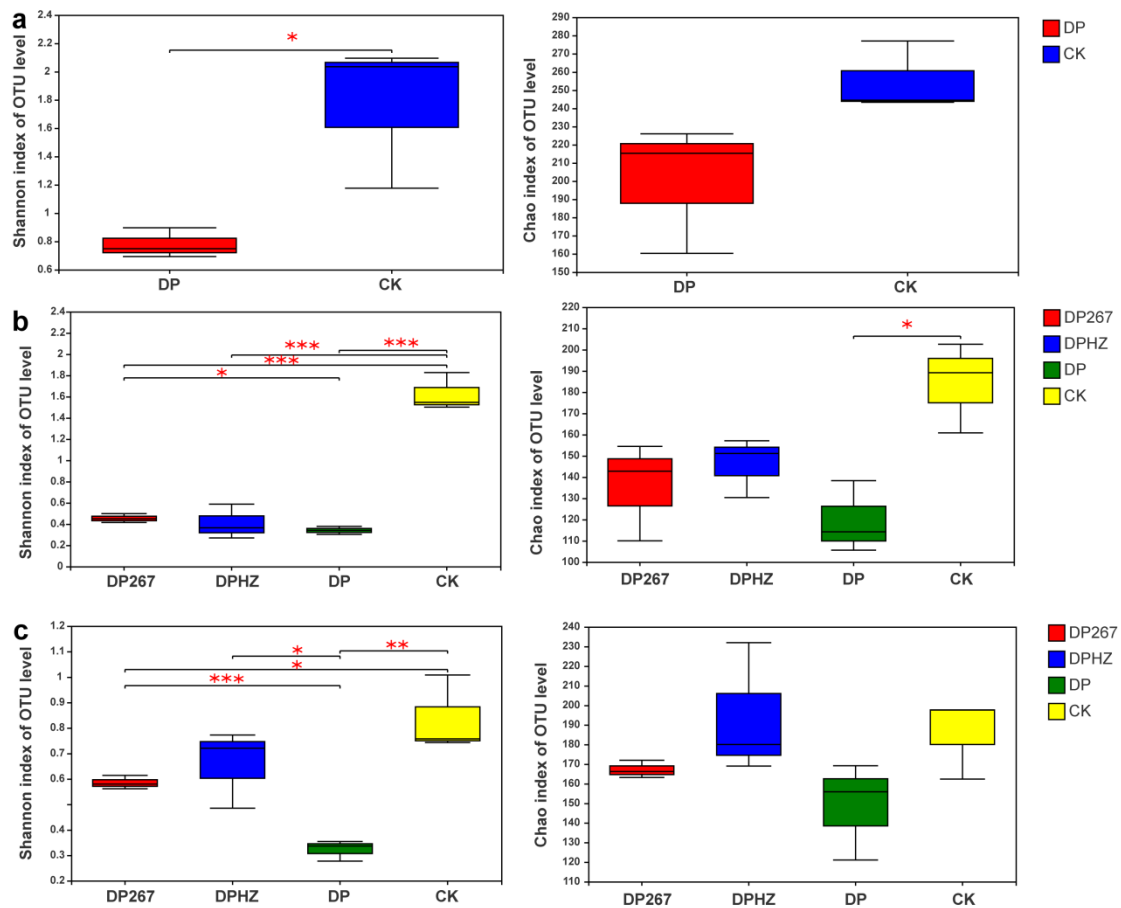

**Fig. 4:** Diversity analysis of fungi in response to the following treatments: DP267 = *Trichoderma* spp. strain 267 added to soil after fumigation with both dimethyl disulfide (D) and chloropicrin (P). DPHZ = Commercial *T. harzianum* added to soil after fumigation. DP = Fumigation without the addition of *Trichoderma*. CK = Untreated control. Soil was sampled from each treatment 2-20 cm deep on day 1 before applying *Trichoderma* (a), on day 7 after the third applying *Trichoderma* (b) and when the cucumber plants were uprooted(c). The number of asterisks indicates the degree of correlation ( $P < 0.05$ ): (\* $p < 0.05$ , \*\* $p < 0.01$ , \*\*\* $p < 0.001$ ).



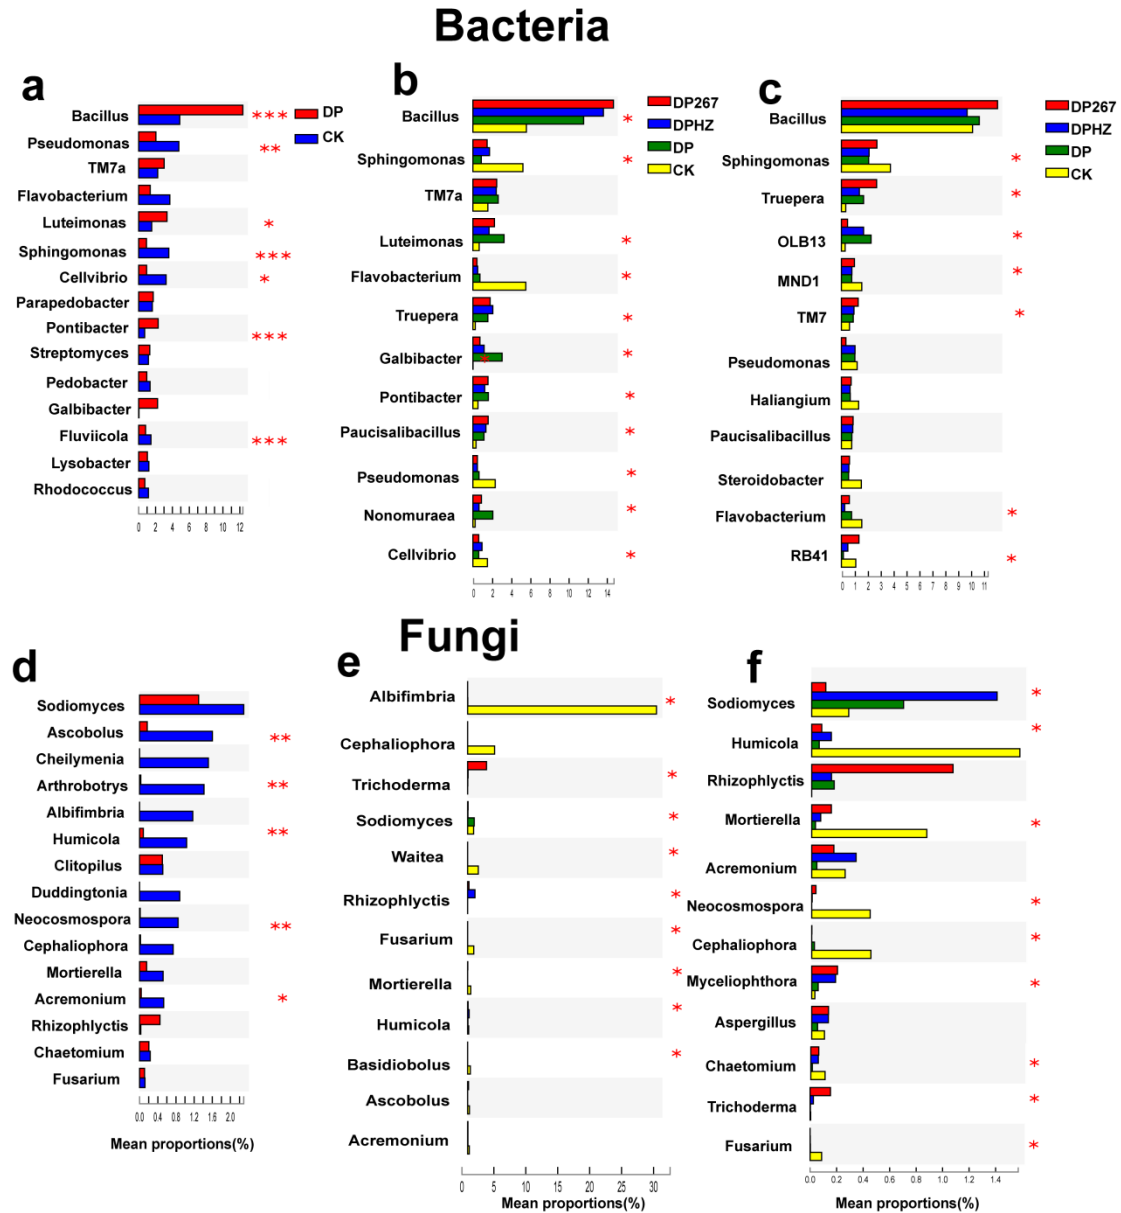

**Fig. 5:** Relative abundance of bacterial (a, b, c) and fungal (d, e, f) genera in response to the following treatments: DP267 = *Trichoderma* spp. strain 267 added to soil after fumigation with both dimethyl disulfide (D) and chloropicrin (P). DPHZ = Commercial *T. harzianum* added to soil after fumigation. DP = Fumigation without the addition of *Trichoderma*. CK = Untreated control. Soil was sampled from each treatment 2-20 cm deep on day 1 before applying *Trichoderma* (a, d), on day 7 after the third applying *Trichoderma* (b, e) and when the cucumber plants were uprooted (c, f). The number of asterisks indicates the degree of correlation ( $P < 0.05$ ): (\* $p < 0.05$ , \*\* $p < 0.01$ , \*\*\* $p < 0.001$ ).

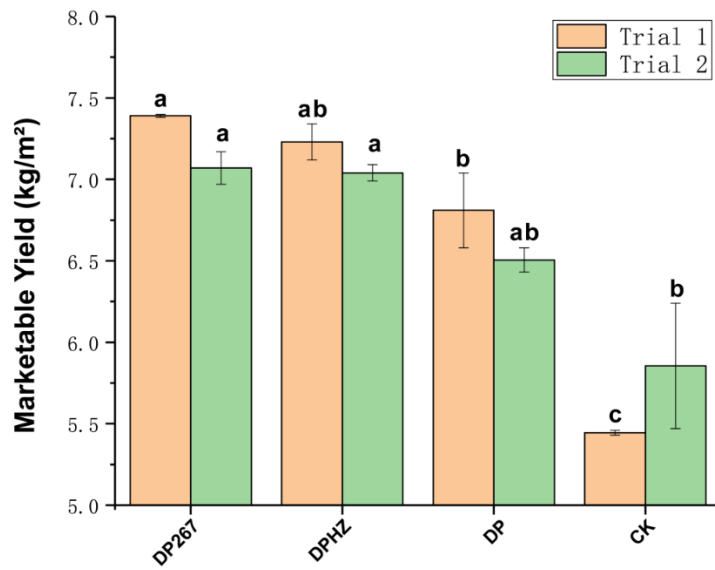

**Fig. 6:** The total marketable yield of cucumber following the fumigation of the soil with both dimethyl disulfide + chloropicrin (DP). DP267 = *Trichoderma* strain 267 added after fumigation; DPHZ = Commercial *T. harzianum* added to soil after fumigation. CK267 = *Trichoderma* strain 267 added to soil without fumigation. CKHZ = Commercial *T. harzianum* added to soil without fumigation. DP = fumigation without *Trichoderma*. CK = untreated control. Means (N = 3) within the same time period accompanied by the same letter were not statistically different (P = 0.05), according to Duncan's new Multiple-Range test.

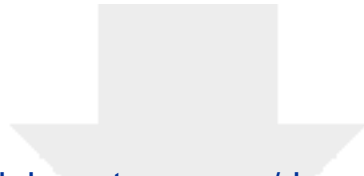

Click here to access/download  
**Supporting Information**  
Supplementary Material.docx

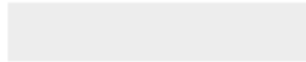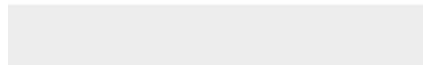

Supplement: pone.0266347.s013.pdf [file pone.0266347.s013.pdf]
